# Supplementary material for: Combining a loop-stem aptamer sequence with methylene blue: a simple assay for thrombin detection by resonance light scattering technique
Source: Royal Society of Chemistry journal article supplement (doi:10.1039/c4ra14729d), 2015-01-01
Supplement: c4ra14729d1.pdf [file c4ra14729d1.pdf]

## Supplementary Information

# **Combining a Loop-Stem Aptamer Sequence with Methylene Blue: A simple assay for Thrombin Detection by Resonance Light Scattering Technique**

Xiaopeng Huang,<sup>a†</sup> Yuqin Li,<sup>b†</sup> Xiang Huang,<sup>a</sup> Yaowen Chen,<sup>c</sup> and Wenhua Gao,<sup>ac\*</sup>

<sup>a</sup> Department of Chemistry, Shantou University, Shantou, Guangdong 515063, P. R. China.

<sup>b</sup> Department of Pharmacy, Taishan Medicine College, Taian, Shandong 271016, P. R. China.

<sup>c</sup> Analysis & Testing Center, Shantou University, Shantou, Guangdong 515063, P. R. China.

\* *Corresponding author. Tel: +86-22-86502774; Fax: +86-22-82903941*  
*E-mail address: [whgao@stu.edu.cn](mailto:whgao@stu.edu.cn)*

† Both the authors contributed equally to the paper.

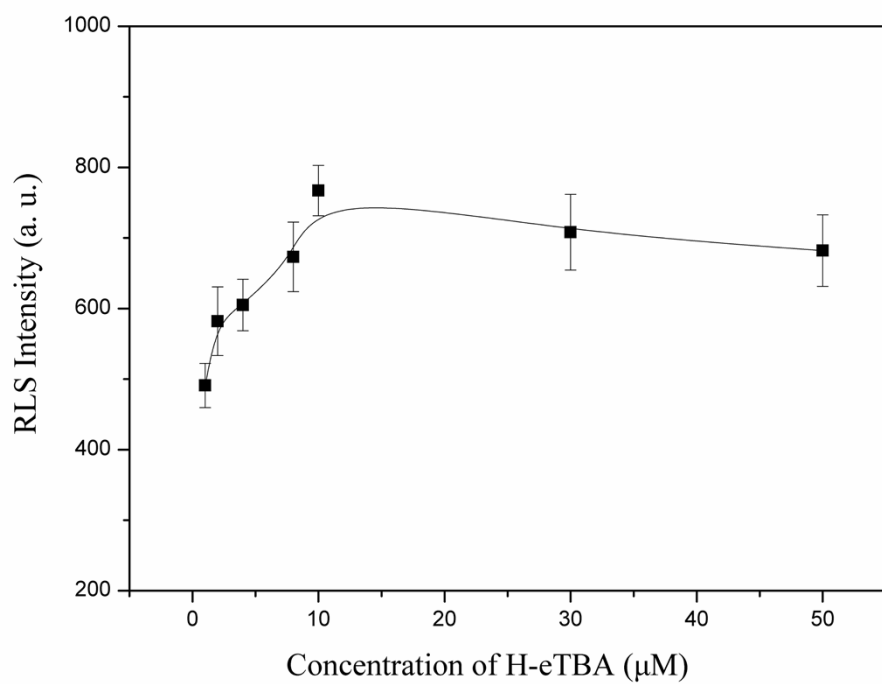

Fig. S1 RLS spectra of the reaction system upon different concentration of H-eTBA (1 μL, 1, 2, 4, 8, 10, 30 and 50 μM). Conditions: MB: 50 μM; pH value: 7.40. Error bars were the standard deviation of three repetitive measurements.

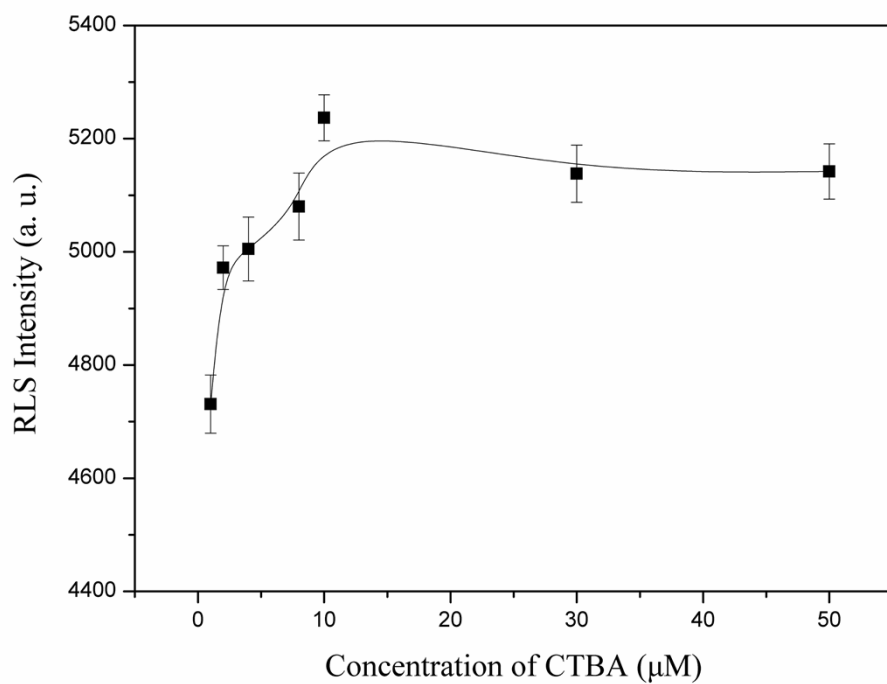

Fig. S2 RLS spectra of the reaction system upon different concentration of CTBA (1  $\mu\text{L}$ , 1, 2, 4, 8, 10, 30 and 50  $\mu\text{M}$ ). Conditions: MB: 50  $\mu\text{M}$ ; H-eTBA: 1  $\mu\text{L}$ , 10  $\mu\text{M}$ ; pH value: 7.40. Error bars were the standard deviation of three repetitive measurements.

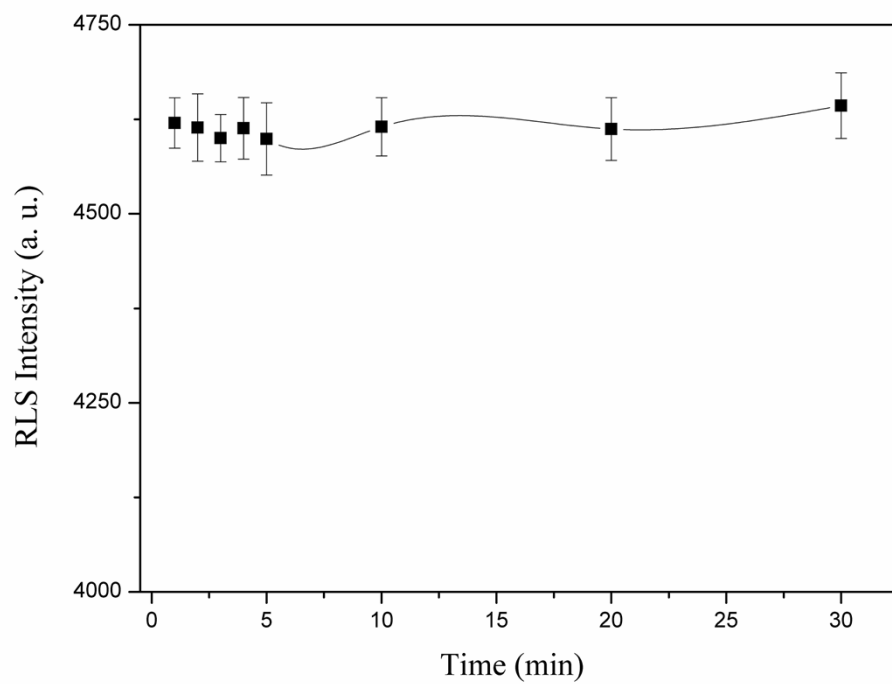

Fig. S3 RLS spectra of the reaction system upon the different incubation time. Conditions: MB: 50  $\mu$ M; H-eTBA: 1  $\mu$ L, 10  $\mu$ M; CTBA: 1  $\mu$ L, 10  $\mu$ M; thrombin: 4.91 nM; pH value: 7.40. Error bars were the standard deviation of three repetitive measurements.

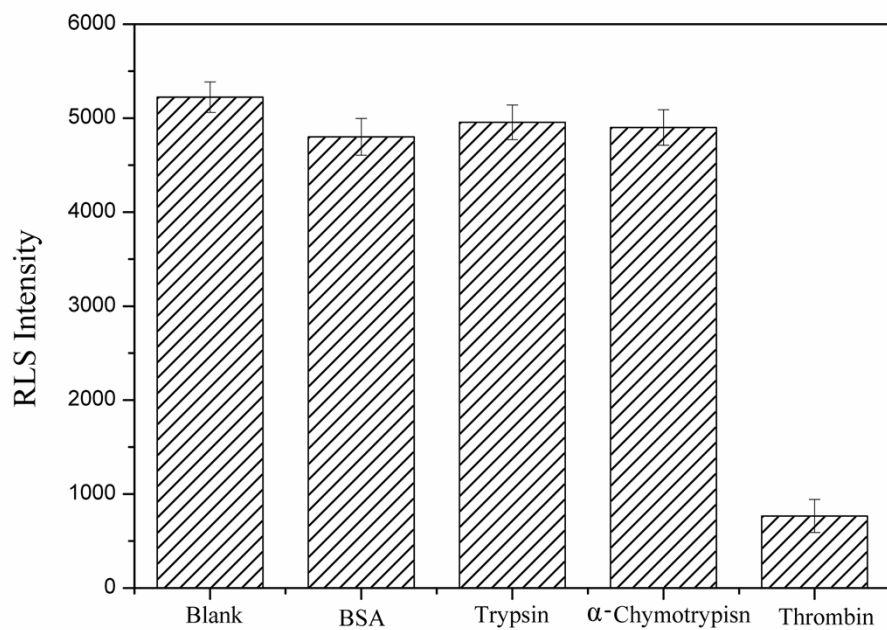

Fig. S4 RLS intensity comparison of the protein interferences toward human thrombin. All interferences (BSA, Trypsin and  $\alpha$ -Chymotrypsin) were tested at the concentration of 27.25 nM. The RLS signal of thrombin was tested at 17.18 nM. Other conditions: MB: 50  $\mu$ M; H-eTBA: 1  $\mu$ L, 10  $\mu$ M; CTBA: 1  $\mu$ L, 10  $\mu$ M; pH7.40. Error bars were the standard deviation of three repetitive measurements.
